# Supplementary material
Source: PubMed Central journal article supplement (PMC3064224)

Figure 1. Lck is not expressed in neutrophils (PMN). A) Western blot detecting Lck in PMN and PBMC. B) Immunofluorescence labeling demonstrating that Lck is expressed in SIRP $\alpha$ -negative cells in PBMC, mainly lymphocytes, but not in SIRP $\alpha$ -positive monocytes or PMN. (Antibody against Lck was purchased from Cell Signaling Technology.) Note: SIRP $\alpha$  is restricted in myeloid lineages, including PMN, monocytes and dendritic cells, but not expressed in lymphocytes. Few Lck-positive cells detected in isolated PMN were likely due to an unavoidable contamination of PBMC. In general, PMN are separated from PBMC by Ficoll-Paque density gradient (used for this study) or gelatin sedimentation. The former method normally produces PMN of 90-95% purity while the latter method produces PMN of varied purity, between 70-90%. Expression of Lck in eosinophils was also reported (Stafford et al. *The Journal of Immunology*, 2002; Lynch et al. *Blood*, 2000) and may account for few Lck-positive cells in the preparation of PMN.

sFigure 1

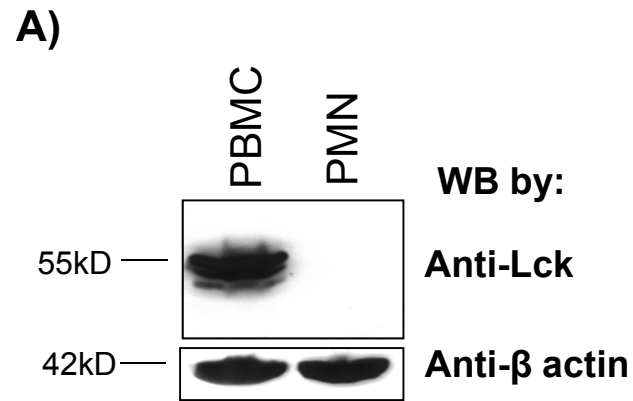

**B)**

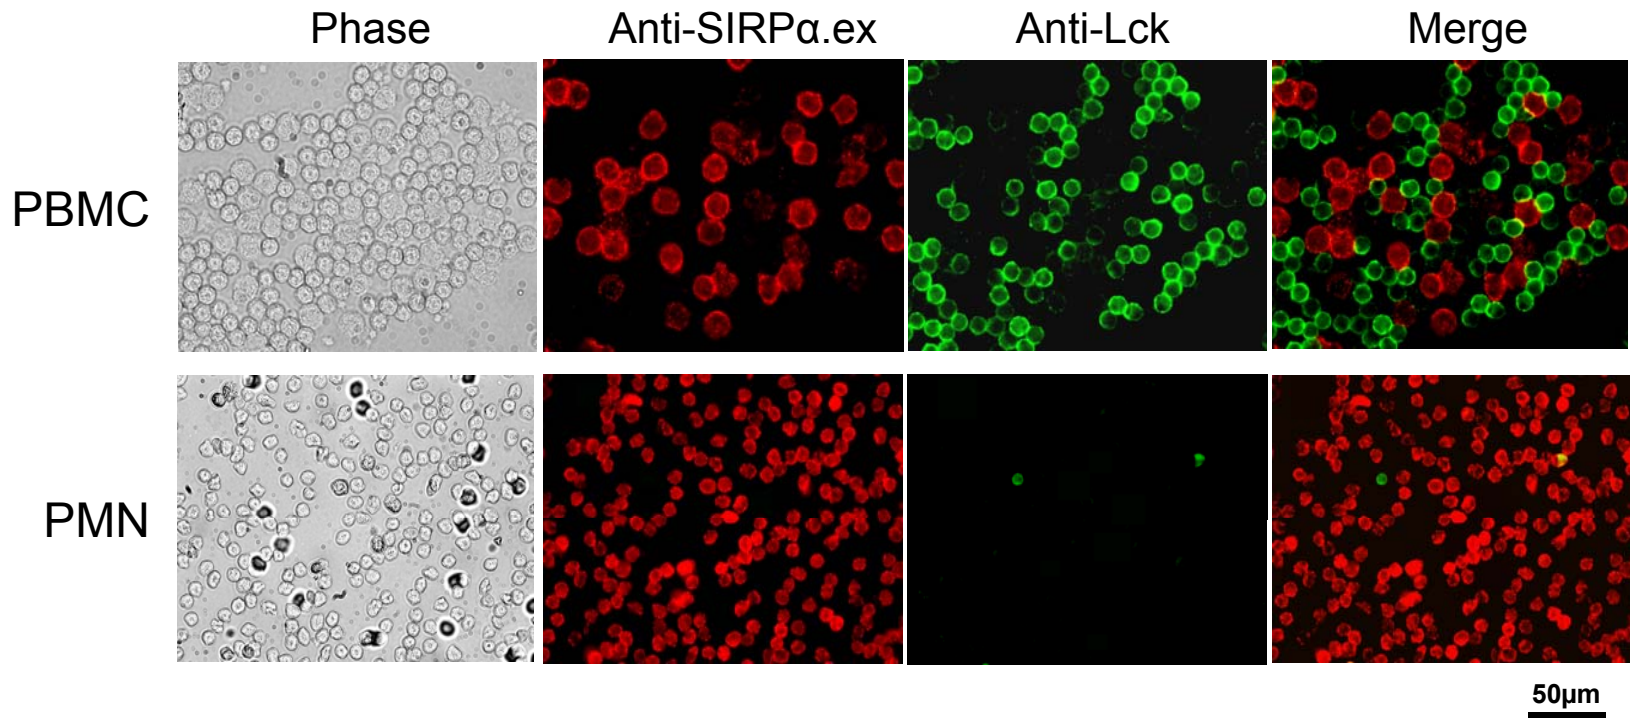

Supplement: supp_M110.154203_jbc.M110.154203-1.pdf [file supp_M110.154203_jbc.M110.154203-1.pdf]
